# Supplementary figures and images for: Scale-dependent measurement and analysis of ground surface temperature variability in alpine terrain
Source: Copernicus journal article supplement (doi:10.5194/tc-5-431-2011), 2011-05-25

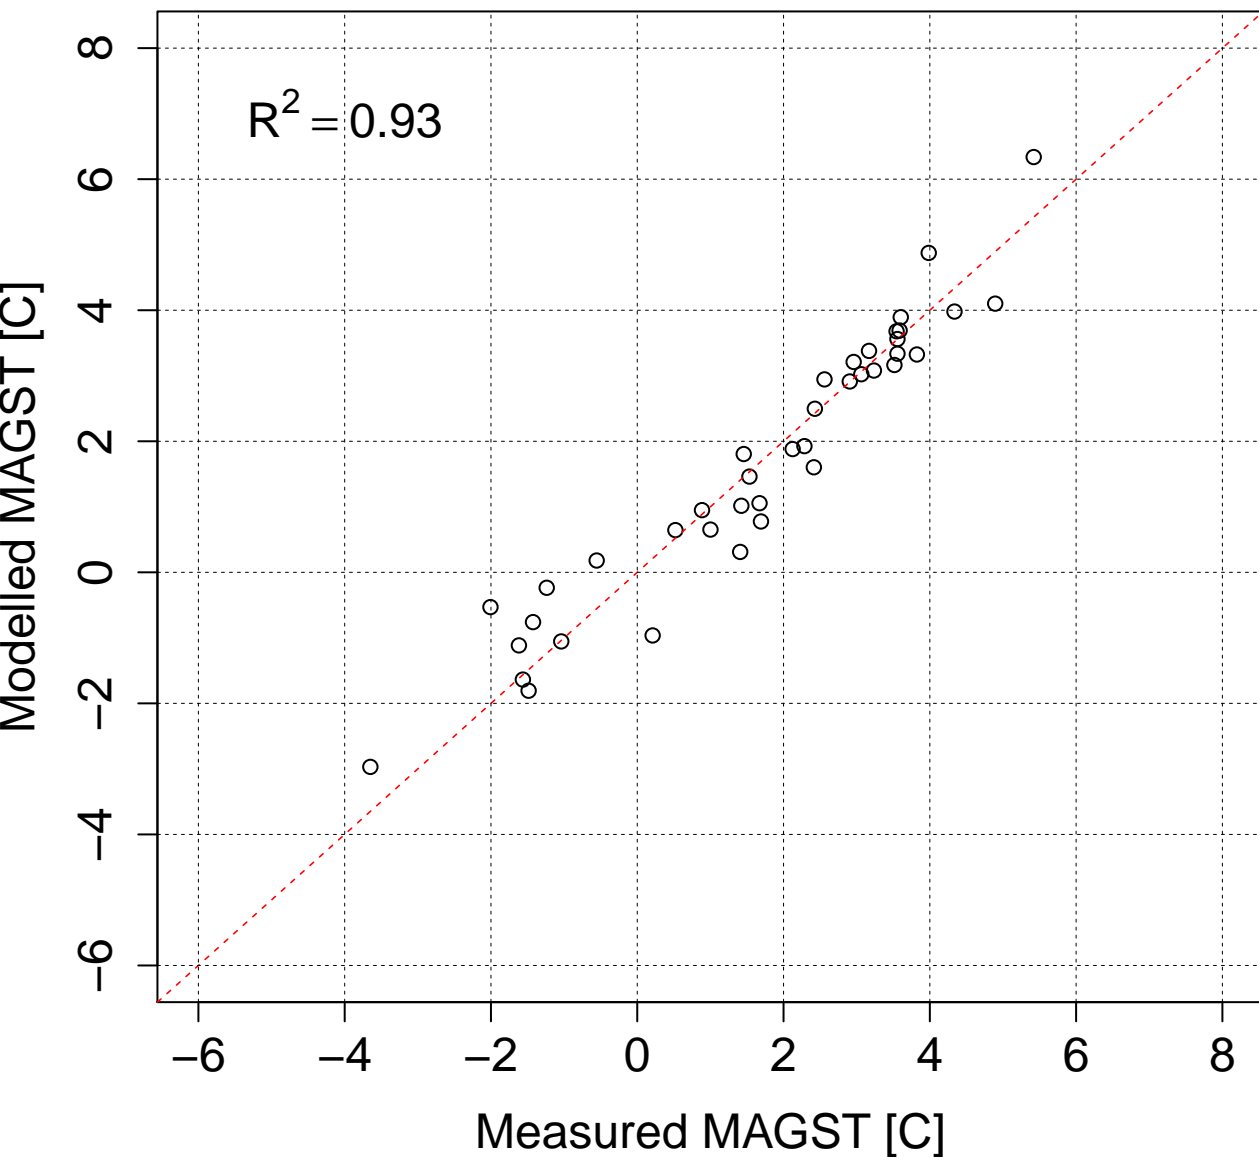

Supplement: Supplementary file 1 [file tc-5-431-2011-supplement.zip]

**AD**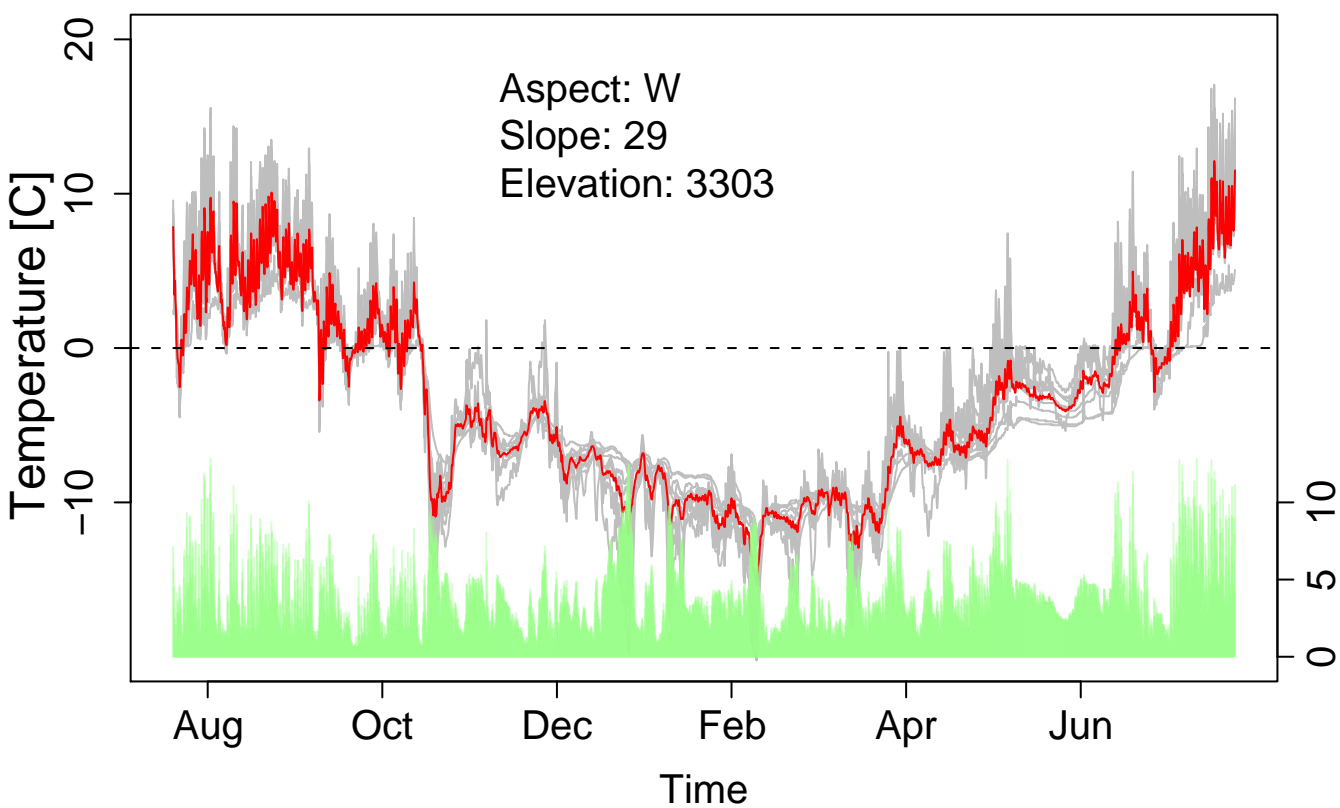**AX**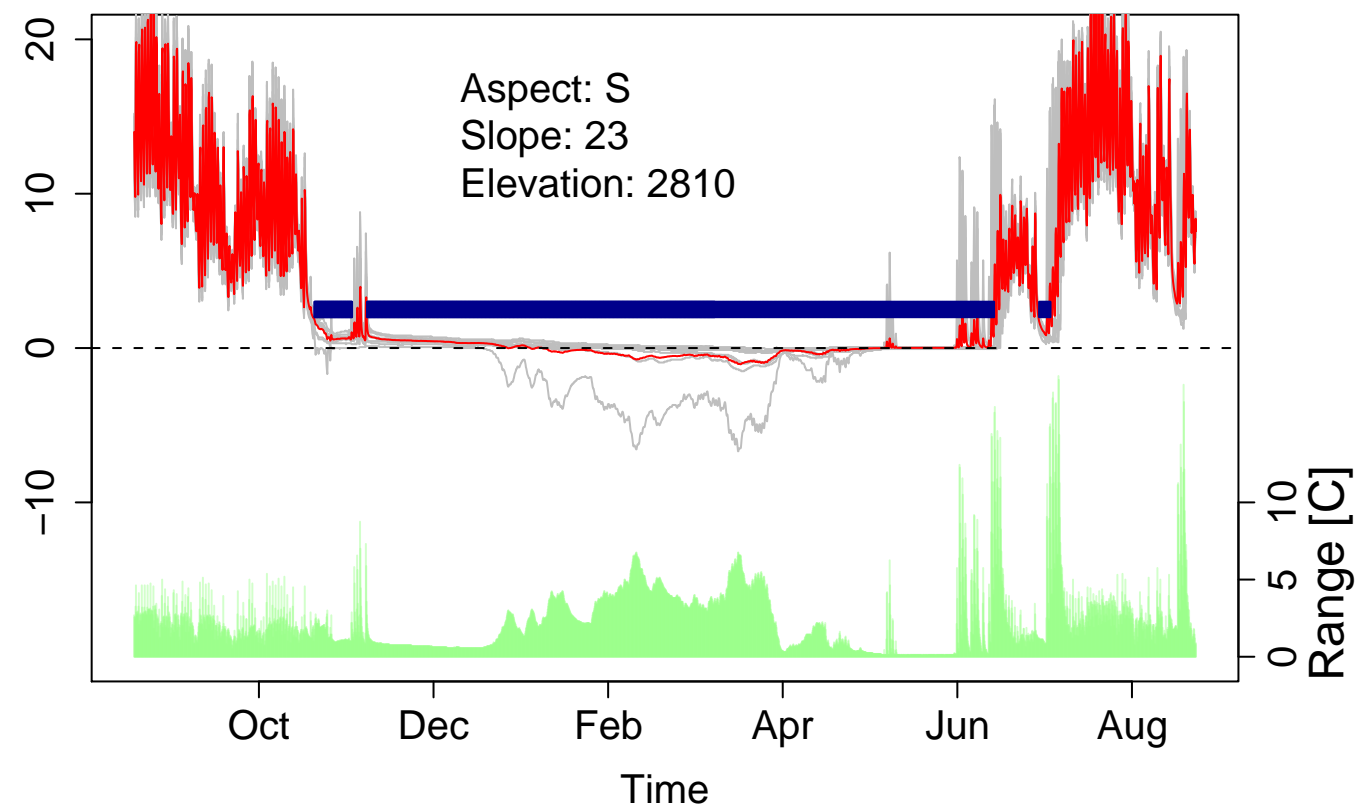**AJ**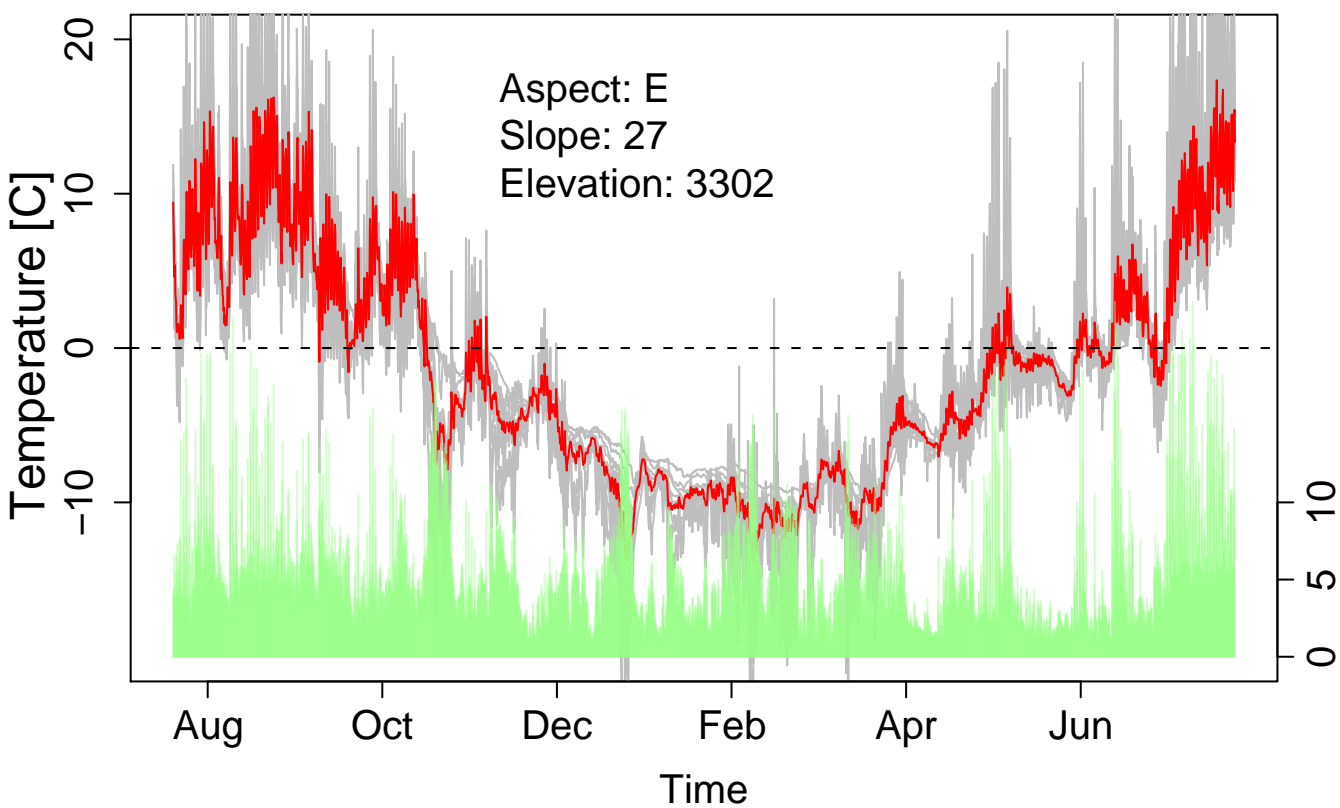**BC**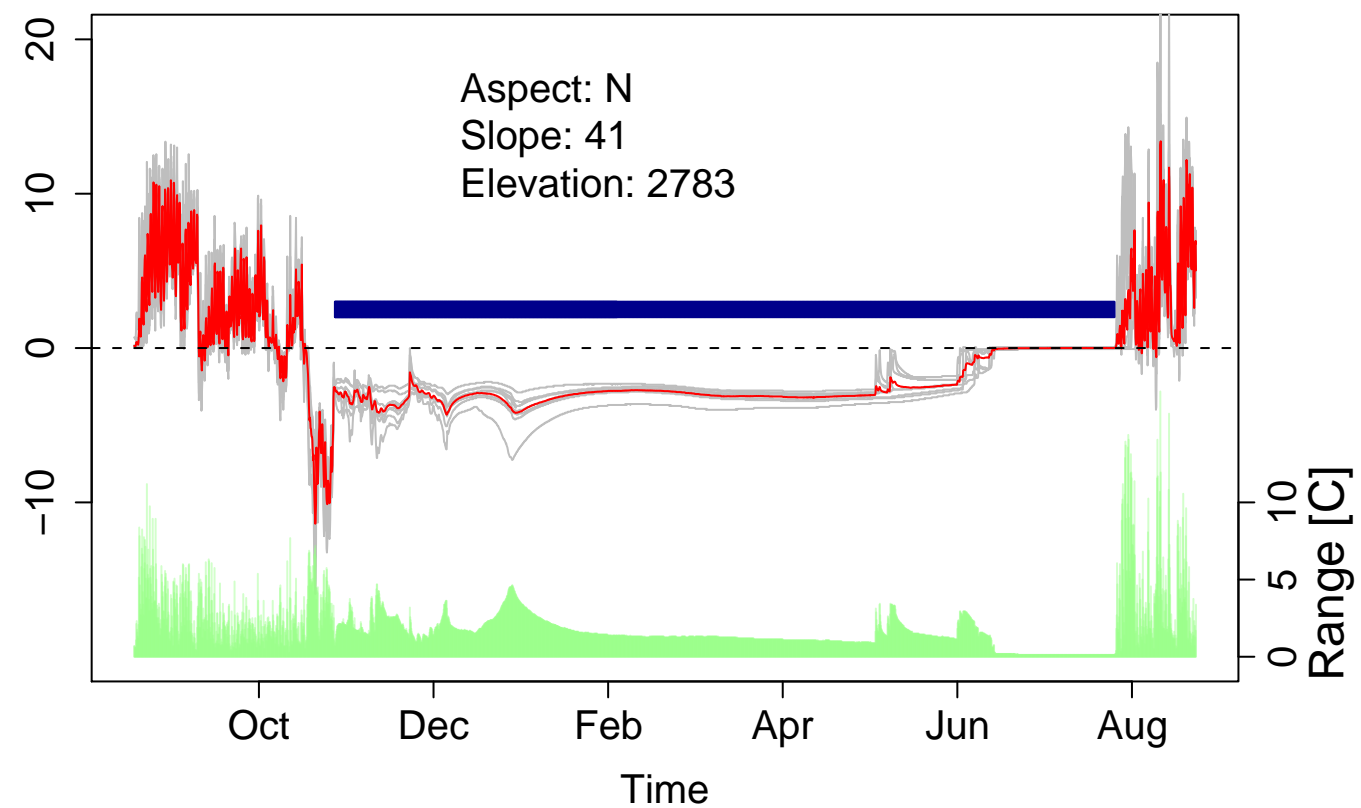

Supplement: Supplementary file 2 [file tc-5-431-2011-supplement.zip]

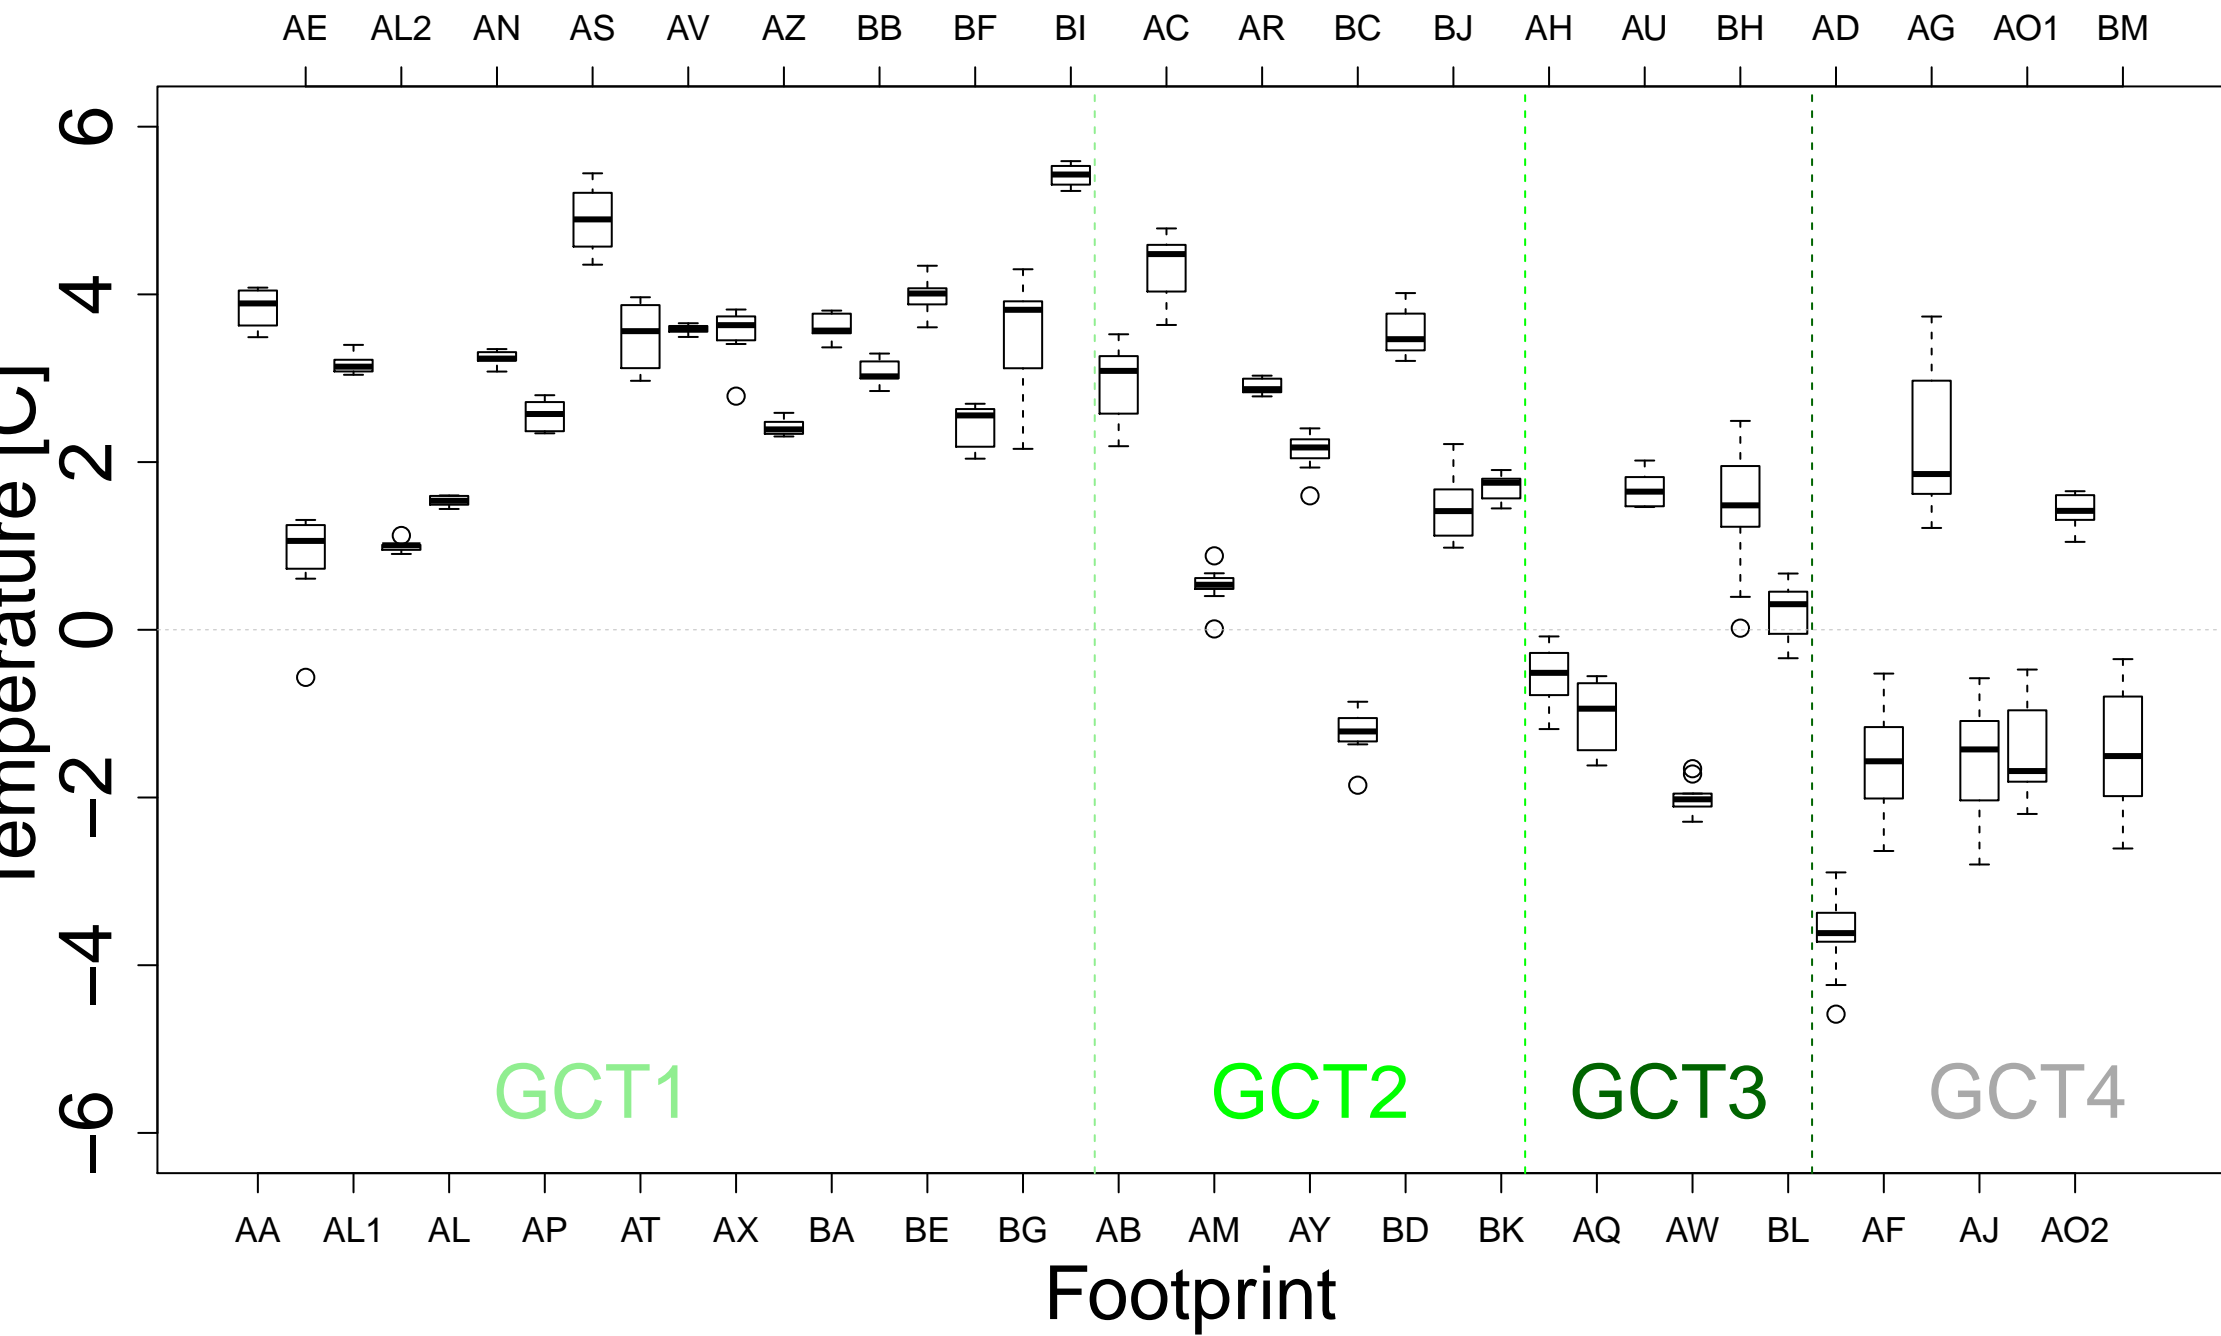

Supplement: Supplementary file 3 [file tc-5-431-2011-supplement.zip]

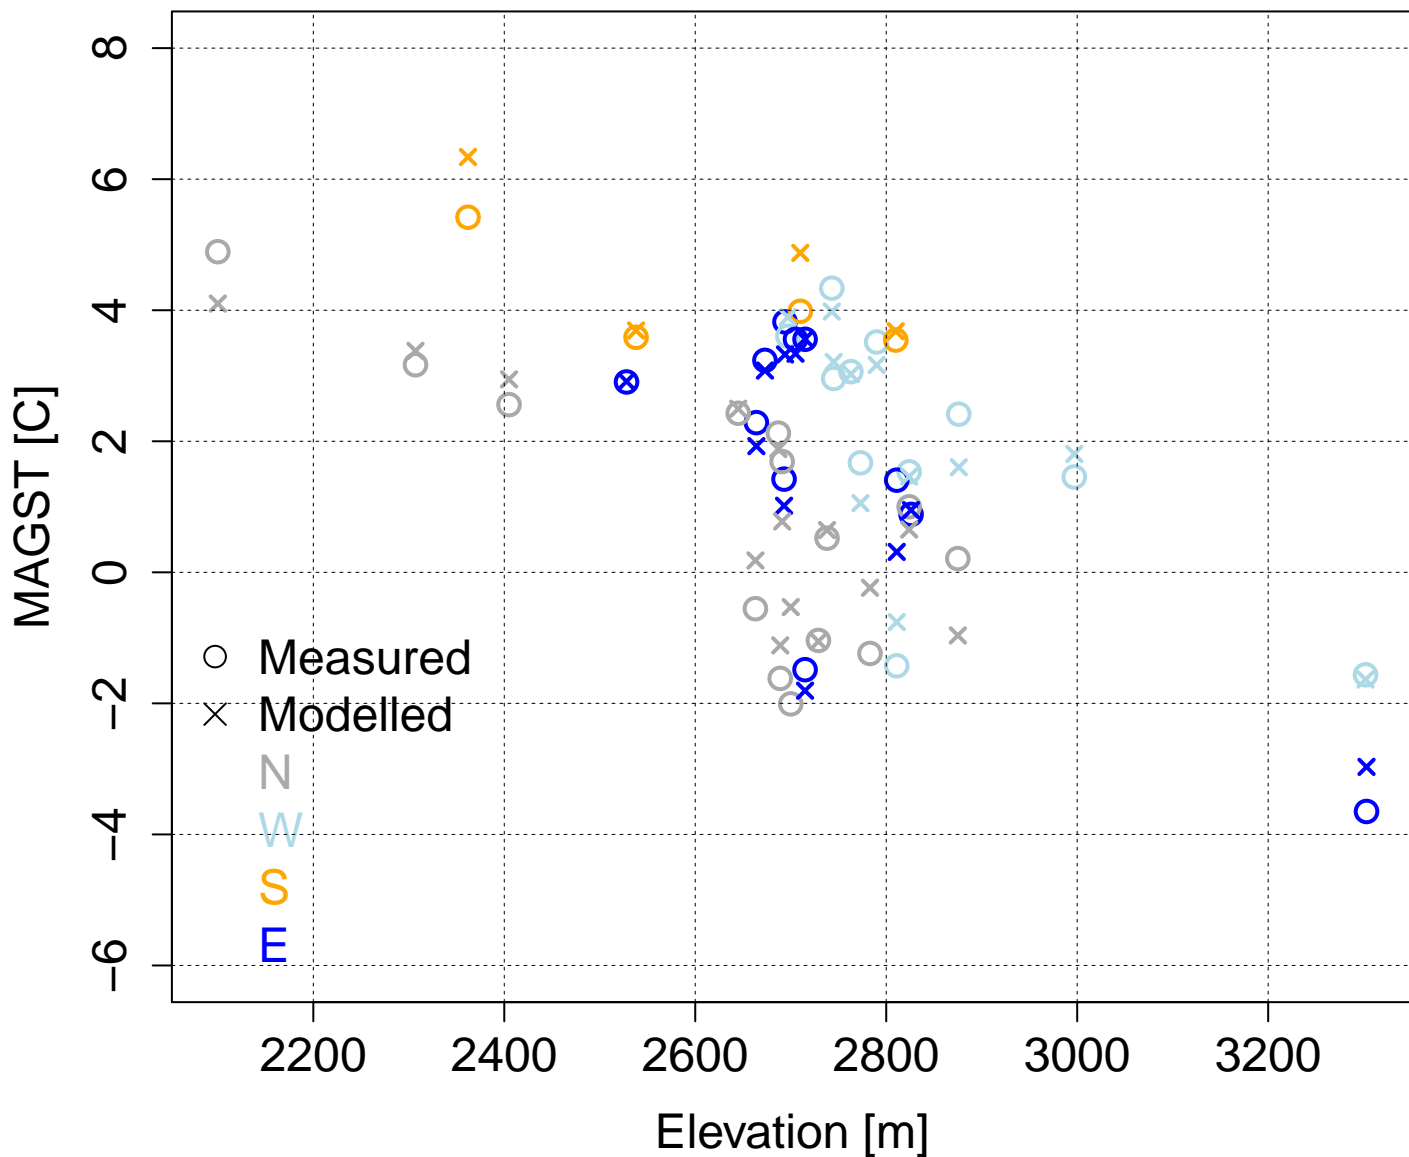

Supplement: Supplementary file 4 [file tc-5-431-2011-supplement.zip]
